# Supplementary material for: Elevated Cytokines, Thrombin and PAI-1 in Severe HCPS Patients Due to Sin Nombre Virus
Source: MDPI journal article supplement (doi:10.3390/v7020559), 2015-02-10
Supplement: s1 [file s1]

**Table S1.** Tryptic peptides from Spot #31 measured by MALDI-TOF. The protein was identified as pregnancy zone protein, SwissProt accession P20742. Measured masses from the MALDI-TOF spectrum are compared to calculated values. Masses listed represent 21% sequence coverage. MS-Fit MOWSE score: 5.89e+09; Mascot score: 74, expect value: 7.4e-04

| Measured mass,<br>amu (average) | Calculated mass,<br>amu (average) | error, amu | Sequence Position |      | Sequence                               |
|---------------------------------|-----------------------------------|------------|-------------------|------|----------------------------------------|
|                                 |                                   |            | Start             | End  |                                        |
| 1505.39                         | 1505.74                           | -0.35      | 81                | 92   | K.DLFHCVSFTLPR.I                       |
| 3177.41                         | 3177.67                           | -0.26      | 117               | 144  | R.NTVLVLNTQSLVVFVQTDKPMYKPGQTVR.F      |
| 1583.64                         | 1583.83                           | -0.18      | 158               | 170  | R.NELIPLIYLENPR.R                      |
| 973.29                          | 973.13                            | 0.17       | 174               | 181  | R.IAQWQSLK.L                           |
| 1031.16                         | 1031.12                           | 0.04       | 204               | 213  | R.VVVQTESGGR.I                         |
| 1683.67                         | 1683.94                           | -0.27      | 214               | 227  | R.IQHPFTVEEFVLPK.F                     |
| 2893.40                         | 2893.13                           | 0.28       | 280               | 303  | K.QEVCEEFSQQLNSNGCITQQVHTK.M           |
| 2153.45                         | 2153.53                           | -0.07      | 304               | 321  | K.MLQITNTGFEMKLRVEAR.I + Oxidation (M) |
| 1602.73                         | 1602.70                           | 0.03       | 322               | 335  | R.IREEGTDLEVTANR.I                     |
| 1631.54                         | 1631.91                           | -0.37      | 357               | 371  | R.QGIPFFAQVLLVDGK.G                    |
| 1458.53                         | 1458.59                           | -0.06      | 504               | 517  | R.SGHTLTPVESGDMK.G                     |
| 1474.54                         | 1474.59                           | -0.05      | 504               | 517  | R.SGHTLTPVESGDMK.G + Oxidation (M)     |
| 1862.86                         | 1863.07                           | -0.21      | 518               | 535  | K.GSFALSFPVESDVAPIAR.M                 |
| 2934.26                         | 2934.40                           | -0.14      | 595               | 621  | R.AVDQSVLLMKPEAELSVSSVYNLLTVK.D        |
| 1317.56                         | 1317.58                           | -0.02      | 673               | 683  | K.VFTNSKIRKPK.S                        |
| 2096.93                         | 2097.31                           | -0.37      | 773               | 793  | K.AGAFCLSEDAGLGISSTASLR.A              |
| 1501.27                         | 1501.60                           | -0.33      | 848               | 859  | K.GEESYCICGNER.Q                       |
| 1160.00                         | 1160.32                           | -0.32      | 860               | 869  | R.QTLSWTVTPK.T                         |
| 2406.19                         | 2406.52                           | -0.33      | 1021              | 1040 | R.QLNYKHQDGSYSTFGERYGR.N               |
| 3240.96                         | 3241.36                           | -0.40      | 1455              | 1482 | K.VYDYYETDESVAEYIAPCSTDTEHGNV.-        |

**Table S2.** Tryptic peptides from Spot #38 measured by MALDI-TOF. The protein was identified as alpha-1-antitrypsin, SwissProt accession P01009. Measured masses from the MALDI-TOF spectrum are compared to calculated values. Masses listed represent 33% sequence coverage. MS-Fit MOWSE score: 2.12e+05; Mascot score: 82, expect value: 1.2e-04

| Measured mass,<br>amu (average) | Calculated mass,<br>amu (average) | error, amu | Sequence Position |     | Sequence                           |
|---------------------------------|-----------------------------------|------------|-------------------|-----|------------------------------------|
|                                 |                                   |            | Start             | End |                                    |
| 1641.76                         | 1641.86                           | -0.10      | 50                | 63  | K.ITPNLAEFAFSLYR.Q                 |
| 2575.06                         | 2574.84                           | 0.23       | 126               | 149 | R.TLNQPDSQLQLTTGNGLFLSEGLK.L       |
| 2058.19                         | 2058.16                           | 0.03       | 161               | 178 | K.LYHSEAFVNFQDTEEA.K               |
| 1008.11                         | 1008.08                           | 0.03       | 180               | 187 | K.QINDYVEK.G                       |
| 1090.25                         | 1090.23                           | 0.02       | 218               | 225 | K.WERPFEVK.D                       |
| 1891.55                         | 1891.94                           | -0.39      | 226               | 241 | K.DTEEEEDFHVDQVTTVK.V              |
| 1092.11                         | 1092.35                           | -0.24      | 259               | 267 | K.LSSWVLLMK.Y + Oxidation (M)      |
| 1803.90                         | 1804.01                           | -0.11      | 284               | 298 | K.LQHLENELTHDIITK.F                |
| 1856.12                         | 1856.19                           | -0.07      | 390               | 404 | K.FNKPFFVFLMIEQNTK.S               |
| 1561.51                         | 1561.84                           | -0.33      | 405               | 418 | K.SPLFMGKVVNPTQK.- + Oxidation (M) |

**Table S3.** Tryptic peptides from Spot #179 measured by MALDI-TOF. The protein was identified as haptoglobin, SwissProt accession P00738. Measured masses from the MALDI-TOF spectrum are compared to calculated values. Masses listed represent 27% sequence coverage. MS-Fit MOWSE score: 8.15e+02; Mascot score: 45, expect value: 5.8e-01

| Measured mass,<br>amu (average) | Calculated mass,<br>amu (average) | error, amu | Sequence Position |     | Sequence                               |
|---------------------------------|-----------------------------------|------------|-------------------|-----|----------------------------------------|
|                                 |                                   |            | Start             | End |                                        |
| 2635.08                         | 2635.06                           | 0.02       | 229               | 251 | K.QLVEIEKVVLPNYSQVDIGLIK.L             |
| 980.18                          | 980.08                            | 0.11       | 278               | 286 | R.VGYVSGWGR.N                          |
| 1721.56                         | 1721.99                           | -0.43      | 298               | 311 | K.YVMLPVADQDQCIR.H                     |
| 2186.02                         | 2186.51                           | -0.49      | 326               | 345 | K.SPVGVPILNEHTFCAGMSK.Y                |
| 3889.82                         | 3890.07                           | -0.25      | 346               | 379 | K.YQEDTCYGDAGSAFAVHDLEEDTWYATGILSFDK.S |
| 1203.44                         | 1203.34                           | 0.10       | 392               | 401 | K.VTSIQDWVQK.T                         |

**Table S4.** Tryptic peptides from Spot #67 measured by MALDI-TOF. Three proteins were identified:

(A) Serum albumin, SwissProt accession P02790. Measured masses from the MALDI-TOF spectrum are compared to calculated values. Masses listed represent 28% sequence coverage. MS-Fit MOWSE score: 5.65e+04; Mascot score: 56, expect value: 4.6e-02.

| Measured mass,<br>amu (average) | Calculated mass,<br>amu (average) | error, amu | Sequence Position |     | Sequence                          |
|---------------------------------|-----------------------------------|------------|-------------------|-----|-----------------------------------|
|                                 |                                   |            | Start             | End |                                   |
| 1149.14                         | 1149.22                           | -0.07      | 25                | 34  | R.DAHKSEVAHR.F                    |
| 1728.69                         | 1728.88                           | -0.19      | 118               | 130 | K.QEPERNECFLQHK.D                 |
| 2664.59                         | 2665.01                           | -0.41      | 139               | 160 | R.LVRPEVDVMCTAFHDNEETFLK.K        |
| 927.33                          | 927.05                            | 0.28       | 162               | 168 | K.YLYEIAR.R                       |
| 2128.81                         | 2129.31                           | -0.50      | 265               | 281 | K.VHTECCHGDLLECADDR.A             |
| 2989.11                         | 2989.25                           | -0.13      | 311               | 337 | K.SHCIAEVENDEMPADLP SLAADFVESK.D  |
| 1639.79                         | 1639.87                           | -0.08      | 348               | 360 | K.DVFLGMFLYEYAR.R + Oxidation (M) |
| 1467.55                         | 1467.71                           | -0.16      | 361               | 372 | R.RHPDYSVLLLLR.L                  |
| 1311.14                         | 1311.53                           | -0.39      | 362               | 372 | R.HPDYSVLLLLR.L                   |
| 2045.35                         | 2045.33                           | 0.02       | 397               | 413 | K.VFDEFKPLVEEPQNLIK.Q             |
| 960.26                          | 960.13                            | 0.13       | 427               | 434 | K.FQNALLVR.Y                      |
| 1213.10                         | 1213.43                           | -0.33      | 461               | 469 | K.CCKHPEAKR.M                     |
| 1924.80                         | 1925.17                           | -0.36      | 509               | 524 | R.RPCFSALEVDETYVPK.E              |

(B) Prothrombin, SwissProt accession P00734. Measured masses from the MALDI-TOF spectrum are compared to calculated values. Masses listed represent 18% sequence coverage. MS-Fit MOWSE score: 6.13e+03; Mascot score: 40, expect value: 1.8

| Measured mass,<br>amu (average) | Calculated mass,<br>amu (average) | error, amu | Sequence Position |     | Sequence                    |
|---------------------------------|-----------------------------------|------------|-------------------|-----|-----------------------------|
|                                 |                                   |            | Start             | End |                             |
| 2461.14                         | 2460.81                           | 0.33       | 178               | 198 | R.RQEC SIPVCGQDQVT VAMTPR.S |
| 1977.75                         | 1978.15                           | -0.40      | 248               | 263 | K.HQDFNSAVQLVENFCR.N        |
| 1561.60                         | 1561.65                           | -0.05      | 315               | 327 | R.TATSEYQTFFNPR.T           |
| 2026.77                         | 2026.27                           | 0.50       | 328               | 345 | R.TFGSGEADCGLRPLFEKK.S      |
| 1203.97                         | 1204.44                           | -0.46      | 437               | 446 | R.NIEKISMLEK.I              |

|         |         |       |     |     |                                 |
|---------|---------|-------|-----|-----|---------------------------------|
| 1220.49 | 1220.44 | 0.06  | 437 | 446 | R.NIEKISMLEK.I + Oxidation (M)  |
| 1515.54 | 1515.82 | -0.28 | 441 | 452 | K.ISMLEKIYIHR.Y + Oxidation (M) |
| 2246.24 | 2246.67 | -0.43 | 518 | 537 | K.GQPSVLQVVNLPIVERPVCK.D        |
| 1189.23 | 1189.32 | -0.09 | 600 | 608 | K.YGFYTHVFR.L                   |

(C) Hemopexin, SwissProt accession P02790. Measured masses from the MALDI-TOF spectrum are compared to calculated values. Masses listed represent 23% sequence coverage. MS-Fit MOWSE score: 4.53e+03

| Measured mass,<br>amu (average) | Calculated mass,<br>amu (average) | error, amu | Sequence Position |     | Sequence                            |
|---------------------------------|-----------------------------------|------------|-------------------|-----|-------------------------------------|
|                                 |                                   |            | Start             | End |                                     |
| 1220.50                         | 1220.37                           | 0.13       | 92                | 102 | K.NFPSPVDAAFR.Q                     |
| 2378.63                         | 2378.71                           | -0.08      | 131               | 151 | K.LLQDEFPGIPSPLDAAVECHR.G           |
| 1509.82                         | 1509.72                           | 0.10       | 198               | 208 | R.YYCFQGNQFLR.F                     |
| 1156.28                         | 1156.36                           | -0.08      | 226               | 234 | R.DYFMPCPGR.G                       |
| 2512.56                         | 2512.85                           | -0.29      | 348               | 371 | K.EVGTPHGIILDSVDAAFCPGSSR.L         |
| 1924.81                         | 1924.37                           | 0.44       | 372               | 386 | R.LHIMAGRRLWWLDLK.S + Oxidation (M) |
| 1750.09                         | 1750.03                           | 0.06       | 447               | 462 | K.ALQPQNVTSLLGCTH -                 |

**Table S5.** Tryptic peptides from Spot #100 measured by MALDI-TOF. The protein was identified as 6-phosphofructo-2-kinase/fructose-2,6-bisphosphatase 4, SwissProt accession Q16877. Measured masses from the MALDI-TOF spectrum are compared to calculated values. Masses listed represent 32% sequence coverage. MS-Fit MOWSE score: 4.68e+04; Mascot score: 55, expect value: 6.1e-02

| Measured mass,<br>amu (average) | Calculated mass,<br>amu (average) | error, amu | Sequence Position |     | Sequence                     |
|---------------------------------|-----------------------------------|------------|-------------------|-----|------------------------------|
|                                 |                                   |            | Start             | End |                              |
| 1481.69                         | 1481.70                           | 0.00       | 2                 | 14  | M.ASPRELTONPLKK.I            |
| 2071.15                         | 2071.39                           | -0.24      | 15                | 31  | K.IWMPYSNGRPALHACQR.G        |
| 1168.53                         | 1168.26                           | 0.27       | 72                | 80  | R.EFNVGQYRR.D                |
| 1671.72                         | 1671.80                           | -0.08      | 88                | 101 | K.SFEFFLPDNEEGLK.I           |
| 2336.90                         | 2336.47                           | 0.43       | 117               | 137 | R.FLSEEGGHVAVFDATNTTRER.R    |
| 1619.31                         | 1618.94                           | 0.37       | 238               | 250 | R.IVYYLMNIHVTPR.S            |
| 1239.01                         | 1239.34                           | -0.33      | 257               | 267 | R.HGESENLKGR.I               |
| 1711.08                         | 1711.02                           | 0.06       | 383               | 396 | R.QENVLVICHQAVMR.C           |
| 2170.95                         | 2170.57                           | 0.38       | 397               | 414 | R.CLLAYFLDKAAEQLPYLK.C       |
| 1032.32                         | 1032.19                           | 0.13       | 406               | 414 | K.AAEQLPYLK.C                |
| 2673.80                         | 2674.08                           | -0.28      | 423               | 446 | K.LTPVAYGCKVESIFLNVAAVNTHR.D |

**Table s6.** Tryptic peptides from Spot #167 measured by MALDI-TOF. The protein was identified as a fragment of complement C3, NCBI accession gi:194384410. Measured masses from the MALDI-TOF spectrum are compared to calculated values. Masses listed represent 7% sequence coverage. MS-Fit MOWSE score: 1.01e+05; Mascot score: 49, expect value: 2.5e-01

| Measured mass,<br>amu (average) | Calculated mass,<br>amu (average) | error, amu | Sequence<br>Position<br>Start | End | Sequence                     |
|---------------------------------|-----------------------------------|------------|-------------------------------|-----|------------------------------|
| 954.93                          | 955.09                            | -0.16      | 693                           | 699 | K.CCEDGM.R.E                 |
| 1038.25                         | 1038.22                           | 0.03       | 713                           | 721 | R.FISLGEACK.K                |
| 1859.18                         | 1859.17                           | 0.01       | 722                           | 735 | K.KVFLDCCNYITEL.R            |
| 1730.91                         | 1731.00                           | -0.09      | 723                           | 735 | K.VFLDCCNYITEL.R             |
| 1816.71                         | 1816.92                           | -0.20      | 749                           | 764 | R.SNLDEDI.AEENIVSR.S         |
| 2070.23                         | 2070.41                           | -0.18      | 862                           | 879 | K.VRVELLHNPAFCSLATTK.R       |
| 1471.62                         | 1471.62                           | 0.00       | 914                           | 926 | K.AAVYHHFISDGVR.K            |
| 2755.90                         | 2755.85                           | 0.05       | 955                           | 979 | R.EGVQKEDIPPADLSQVDPTESETR.I |
| 2214.24                         | 2214.25                           | -0.01      | 960                           | 979 | K.EDIPPADLSQVDPTESETR.I      |
| 2157.30                         | 2157.40                           | -0.10      | 980                           | 999 | R.ILLQGTPVAQMTEDAVDAER.L     |

**Table S7.** Tryptic peptides from Spot #180 measured by MALDI-TOF. The protein was identified as plasminogen activator inhibitor 1, SwissProt accession P05121. Measured masses from the MALDI-TOF spectrum are compared to calculated values. Masses listed represent 36% sequence coverage. MS-Fit MOWSE score: 1.02e+07; Mascot score: 110, expect value: 2e-07

| Measured mass,<br>amu (average) | Calculated mass,<br>amu (average) | error, amu | Sequence<br>Position<br>Start | End | Sequence                                  |
|---------------------------------|-----------------------------------|------------|-------------------------------|-----|-------------------------------------------|
| 2450.33                         | 2450.72                           | -0.39      | 104                           | 124 | K.ELMGPWNKDEISTTDAIFVQR.D                 |
| 2466.48                         | 2466.72                           | -0.24      | 104                           | 124 | K.ELMGPWNKDEISTTDAIFVQR.D + Oxidation (M) |
| 1494.58                         | 1494.60                           | -0.02      | 112                           | 124 | K.DEISTTDAIFVQR.D                         |
| 1378.66                         | 1378.64                           | 0.02       | 128                           | 138 | K.LVQGFMPIHFFR.L                          |
| 1394.67                         | 1394.64                           | 0.03       | 128                           | 138 | K.LVQGFMPIHFFR.L + Oxidation (M)          |
| 1795.10                         | 1795.16                           | -0.06      | 128                           | 141 | K.LVQGFMPIHFFRLFR.S                       |
| 1108.22                         | 1108.16                           | 0.06       | 146                           | 154 | K.QVDFSEVER.A                             |
| 1664.86                         | 1664.94                           | -0.08      | 186                           | 199 | R.LVLVNALYFNGQWK.T                        |
| 1144.16                         | 1144.19                           | -0.03      | 200                           | 209 | K.TPFPDSSTHR.R                            |
| 1208.41                         | 1208.32                           | 0.09       | 301                           | 310 | K.FSLETEVDLR.K                            |
| 1551.73                         | 1551.83                           | -0.10      | 311                           | 323 | R.KPLENLGMTDMFR.Q                         |
| 1567.67                         | 1567.83                           | -0.16      | 311                           | 323 | R.KPLENLGMTDMFR.Q + Oxidation (M)         |
| 2601.71                         | 2601.82                           | -0.11      | 324                           | 346 | R.QFQADFTSLSDQEPLHVAQALQK.V               |
| 2304.17                         | 2304.55                           | -0.38      | 347                           | 369 | K.VKIEVNESGTVASSSTAVIVSAR.M               |

**Table S8.** Tryptic peptides from Spot #191 measured by MALDI-TOF. The protein was identified as isocitrate dehydrogenase [NADP] cytoplasmic, SwissProt accession O75874. Measured masses from the MALDI-TOF spectrum are compared to calculated values. Masses listed represent 52% sequence coverage. MS-Fit MOWSE score: 1.38e+08; Mascot score: 157, expect value: 4e-12

| Measured mass,<br>amu (average) | Calculated mass,<br>amu (average) | error, amu | Sequence Position |     | Sequence                            |
|---------------------------------|-----------------------------------|------------|-------------------|-----|-------------------------------------|
|                                 |                                   |            | Start             | End |                                     |
| 1695.83                         | 1695.87                           | -0.04      | 5                 | 20  | K.ISGGSVVEMQGDEMTR.I                |
| 976.26                          | 976.13                            | 0.13       | 101               | 109 | R.NILGGTVFR.E                       |
| 1437.81                         | 1437.77                           | 0.04       | 120               | 132 | R.LVSGWVKPIIGR.H                    |
| 1009.13                         | 1009.03                           | 0.10       | 133               | 140 | R.HAYGDQYR.A                        |
| 2507.42                         | 2507.75                           | -0.32      | 141               | 164 | R.ATDFVVPGPVGKVEITYTPSDGTQK.V       |
| 2559.60                         | 2559.83                           | -0.22      | 165               | 187 | K.VTYLVHNFEEGGVAMGMYNQDK.S          |
| 1445.37                         | 1445.61                           | -0.24      | 223               | 233 | R.FKDIFQEYDK.Q                      |
| 903.02                          | 903.00                            | 0.03       | 244               | 249 | K.IWYEHR.L                          |
| 1168.17                         | 1168.32                           | -0.15      | 261               | 270 | K.SEGGFIWACK.N                      |
| 3265.27                         | 3265.56                           | -0.29      | 271               | 301 | K.NYDGDVQSDSVAQGYGSLGMMTSVLVCPDGK.T |
| 1878.90                         | 1879.03                           | -0.13      | 322               | 338 | K.GQETSTNPIASIFAWTR.G               |
| 2661.32                         | 2660.99                           | 0.34       | 351               | 374 | K.ELAFFANALEEVSIETIEAGFMTK.D        |
| 1509.28                         | 1509.64                           | -0.35      | 389               | 400 | R.SDYLNTFEFMDK.L                    |
| 2406.18                         | 2405.72                           | 0.46       | 389               | 408 | R.SDYLNTFEFMDKLGKIK.L               |
| 914.10                          | 914.10                            | 0.00       | 401               | 408 | K.LGENLKIK.L                        |

**Table S9.** Tryptic peptides from Spot #192 measured by MALDI-TOF. The protein was identified as haptoglobin, SwissProt accession P00738. Measured masses from the MALDI-TOF spectrum are compared to calculated values. Masses listed represent 32% sequence coverage. MS-Fit MOWSE score: 3.23e+04; Mascot score: 78, expect value: 3e-4

| Measured mass,<br>amu (average) | Calculated mass,<br>amu (average) | error, amu | Sequence Position |     | Sequence                              |
|---------------------------------|-----------------------------------|------------|-------------------|-----|---------------------------------------|
|                                 |                                   |            | Start             | End |                                       |
| 920.13                          | 920.02                            | 0.11       | 171               | 178 | K.GSFPWQAK.M                          |
| 2634.96                         | 2635.06                           | -0.10      | 229               | 251 | K.QLVEIEKVVLHPNYSQVDIGLIK.L           |
| 980.18                          | 980.08                            | 0.11       | 278               | 286 | R.VGYVSGWGR.N                         |
| 1721.83                         | 1721.99                           | -0.16      | 298               | 311 | K.YVMLPVADQDQCIR.H                    |
| 2186.03                         | 2186.51                           | -0.48      | 326               | 345 | K.SPVGVQPILNEHTFCAGMSK.Y              |
| 3890.13                         | 3890.07                           | 0.06       | 346               | 379 | K.YQEDTCYGDAGSAFAVHLEEDTWYATGILSFDK.S |
| 1359.11                         | 1359.55                           | -0.43      | 380               | 391 | K.SCAVAEYGVYVK.V                      |
| 1203.20                         | 1203.34                           | -0.14      | 392               | 401 | K.VTSIQDWVQK.T                        |

**Table S10.** Tryptic peptides from Spot #131 measured by MALDI-TOF. The protein was identified as alpha-1-antitrypsin,

SwissProt accession P01009. Measured masses from the MALDI-TOF spectrum are compared to calculated values. Masses listed represent 20% sequence coverage. MS-Fit MOWSE score: 2.63e+04; Mascot score: 88, expect value: 2.9e-05.

| Measured mass, | Calculated mass, | error, amu | Sequence Position |     | Sequence               |
|----------------|------------------|------------|-------------------|-----|------------------------|
| amu (average)  | amu (average)    |            | Start             | End |                        |
| 1641.76        | 1641.86          | -0.10      | 50                | 63  | K.ITPNLAEFASLYR.Q      |
| 2058.22        | 2058.16          | 0.06       | 161               | 178 | K.LYHSEFTVNFGDTEEAK.K  |
| 2186.13        | 2186.33          | -0.20      | 161               | 179 | K.LYHSEFTVNFGDTEEAKK.Q |
| 2090.24        | 2090.38          | -0.13      | 199               | 215 | K.ELDRDTVFAVNYIFFK.G   |
| 1275.55        | 1275.46          | 0.10       | 216               | 225 | K.GKWERPFVK.D          |
| 1090.20        | 1090.23          | -0.03      | 218               | 225 | K.WERPFEVK.D           |
| 1417.78        | 1417.70          | 0.08       | 247               | 257 | K.RLGMFNIQHCK.K        |
| 1261.36        | 1261.52          | -0.15      | 248               | 257 | R.LGMFNIQHCK.K         |
| 1803.97        | 1804.01          | -0.04      | 284               | 298 | K.LQHLENELTHDIITK.F    |

**Table S11.** Tryptic peptides from Spot #136 measured by MALDI-TOF. The protein was identified as alpha-1-antitrypsin,

SwissProt accession P01009. Measured masses from the MALDI-TOF spectrum are compared to calculated values. Masses listed represent 28% sequence coverage. MS-Fit MOWSE score: 7.74e+07; Mascot score: 129, expect value: 2.5e-09.

| Measured mass, | Calculated mass, | error, amu | Sequence Position |     | Sequence               |
|----------------|------------------|------------|-------------------|-----|------------------------|
| amu (average)  | amu (average)    |            | Start             | End |                        |
| 1779.85        | 1779.78          | 0.08       | 35                | 49  | K.TDTSHHDQDHPTFNK.I    |
| 1641.90        | 1641.86          | 0.04       | 50                | 63  | K.ITPNLAEFASLYR.Q      |
| 2058.34        | 2058.16          | 0.18       | 161               | 178 | K.LYHSEFTVNFGDTEEAK.K  |
| 2186.34        | 2186.33          | 0.01       | 161               | 179 | K.LYHSEFTVNFGDTEEAKK.Q |
| 1275.85        | 1275.46          | 0.40       | 216               | 225 | K.GKWERPFVK.D          |
| 1090.32        | 1090.23          | 0.09       | 218               | 225 | K.WERPFEVK.D           |
| 1892.08        | 1891.94          | 0.14       | 226               | 241 | K.DTEEDFHVDQVTTVK.V    |
| 1417.73        | 1417.70          | 0.03       | 247               | 257 | K.RLGMFNIQHCK.K        |
| 1261.52        | 1261.52          | 0.01       | 248               | 257 | R.LGMFNIQHCK.K         |
| 1804.10        | 1804.01          | 0.09       | 284               | 298 | K.LQHLENELTHDIITK.F    |
| 921.98         | 921.95           | 0.03       | 299               | 305 | K.FLENEDR.R            |
| 1077.95        | 1078.14          | -0.18      | 299               | 306 | K.FLENEDRR.S           |
| 1015.19        | 1015.20          | -0.01      | 325               | 334 | K.SVLGQLGITK.V         |

**Table S12.** Tryptic peptides from Spot #146 measured by MALDI-TOF. The protein was identified as alpha-1-antitrypsin, SwissProt accession P01009. Measured masses from the MALDI-TOF spectrum are compared to calculated values. Masses listed represent 31% sequence coverage. MS-Fit MOWSE score: 8.16e+07; Mascot score: 118, expect value: 3.2e-08.

| Measured mass,<br>amu (average) | Calculated mass,<br>amu (average) | error, amu | Sequence<br>Position |     | Sequence                |
|---------------------------------|-----------------------------------|------------|----------------------|-----|-------------------------|
|                                 |                                   |            | Start                | End |                         |
| 1779.92                         | 1779.78                           | 0.15       | 35                   | 49  | K.TDTSHHDDQHPTFNK.I     |
| 1641.90                         | 1641.86                           | 0.04       | 50                   | 63  | K.ITPNLAEFASFSLYR.Q     |
| 2058.30                         | 2058.16                           | 0.14       | 161                  | 178 | K.LYHSEAFVTNFGDTEEAK.K  |
| 2186.22                         | 2186.33                           | -0.11      | 161                  | 179 | K.LYHSEAFVTNFGDTEEAKK.Q |
| 2090.34                         | 2090.38                           | -0.03      | 199                  | 215 | K.ELDRDRTVFALVNYIFFK.G  |
| 1275.89                         | 1275.46                           | 0.44       | 216                  | 225 | K.GKWERPFVEVK.D         |
| 1090.30                         | 1090.23                           | 0.07       | 218                  | 225 | K.WERPFEVK.D            |
| 1892.09                         | 1891.94                           | 0.15       | 226                  | 241 | K.DTEEDFHVDQVTTVK.V     |
| 1261.50                         | 1261.52                           | -0.01      | 248                  | 257 | R.LGMFNIQHCK.K          |
| 1804.08                         | 1804.01                           | 0.07       | 284                  | 298 | K.LQHLENELTHDIITK.F     |
| 922.01                          | 921.95                            | 0.06       | 299                  | 305 | K.FLENEDR.R             |
| 1015.27                         | 1015.20                           | 0.07       | 325                  | 334 | K.SVLGQLGITK.V          |

**Table S13.** Tryptic peptides from Spot #150 measured by MALDI-TOF. The protein was identified as complement C4-B, NCBI accession gi:187771. Measured masses from the MALDI-TOF spectrum are compared to calculated values. Masses listed represent 11% sequence coverage. MS-Fit MOWSE score: 9.18e+04; Mascot score: 51, expect value: 0.17.

| Measured mass,<br>amu (average) | Calculated mass,<br>amu (average) | error, amu | Sequence Position |      | Sequence                                      |
|---------------------------------|-----------------------------------|------------|-------------------|------|-----------------------------------------------|
|                                 |                                   |            | Start             | End  |                                               |
| 1179.42                         | 1179.33                           | 0.09       | 701               | 709  | K.RCCQDGVTR.L                                 |
| 2037.12                         | 2037.44                           | -0.31      | 829               | 844  | R.VFREFHLHLRLPMSVR.R                          |
| 2551.85                         | 2551.74                           | 0.11       | 957               | 979  | R.TLEIPGNSDPNMIPDGDFFNSYVR.V                  |
| 2483.67                         | 2483.73                           | -0.05      | 980               | 1005 | R.VTASDPLDTLGSEGALSPGGVASLLR.L                |
| 1935.77                         | 1936.12                           | -0.35      | 1027              | 1042 | R.YLDKTEQWSTLPPETK.D                          |
| 2960.39                         | 2960.28                           | 0.12       | 1031              | 1055 | K.TEQWSTLPPETKDHAVDLIQKGYMR.I + Oxidation (M) |
| 1324.40                         | 1324.44                           | -0.04      | 1061              | 1072 | R.KADGSYAAWLSR.G                              |
| 1541.97                         | 1541.70                           | 0.27       | 1085              | 1099 | K.VLSLAQEQVGGSPK.L                            |
| 2084.91                         | 2085.40                           | -0.49      | 1183              | 1204 | K.ASAGLLGAHAAAITAYALTLTK.A                    |
| 1433.47                         | 1433.59                           | -0.12      | 1279              | 1291 | K.AEMADQAAWLTR.Q                              |
| 2778.96                         | 2778.98                           | -0.01      | 1301              | 1325 | R.STQDTVIALDALSAYWIASHTTEER.G                 |
| 1367.47                         | 1367.61                           | -0.14      | 1380              | 1390 | K.VLRTYNVLDKMK.N + Oxidation (M)              |
| 983.19                          | 983.14                            | 0.05       | 1383              | 1390 | R.TYNVLDKMK.N                                 |

**Table S14.** Tryptic peptides from Spot #160 measured by MALDI-TOF. The protein was identified as alpha-1-antitrypsin, SwissProt accession P01009. Measured masses from the MALDI-TOF spectrum are compared to calculated values. Masses listed represent 33% sequence coverage. MS-Fit MOWSE score: 4.66e+07; Mascot score: 129, expect value: 2.5e-09.

| Measured mass,<br>amu (average) | Calculated mass,<br>amu (average) | error, amu | Sequence Position |     | Sequence               |
|---------------------------------|-----------------------------------|------------|-------------------|-----|------------------------|
|                                 |                                   |            | Start             | End |                        |
| 1779.84                         | 1779.78                           | 0.07       | 35                | 49  | K.TDTSHHDDHPTFNK.I     |
| 1642.08                         | 1641.86                           | 0.22       | 50                | 63  | K.ITPNLAFAFSLYR.Q      |
| 2058.26                         | 2058.16                           | 0.10       | 161               | 178 | K.LYHSEAFVNFVDTEEA.K   |
| 2186.04                         | 2186.33                           | -0.29      | 161               | 179 | K.LYHSEAFVNFVDTEEAKK.Q |
| 1090.35                         | 1090.23                           | 0.12       | 218               | 225 | K.WERPFEVK.D           |
| 1892.09                         | 1891.94                           | 0.15       | 226               | 241 | K.DTEEDFHVDQVTTVK.V    |
| 1261.82                         | 1261.52                           | 0.31       | 248               | 257 | R.LGMFNIQHCK.K         |
| 1804.07                         | 1804.01                           | 0.06       | 284               | 298 | K.LQHLENELTHDIITK.F    |
| 922.03                          | 921.95                            | 0.08       | 299               | 305 | K.FLENEDR.R            |
| 1110.37                         | 1110.26                           | 0.12       | 315               | 324 | K.LSITGTDLK.S          |
| 1015.17                         | 1015.20                           | -0.03      | 325               | 334 | K.SVLGQLGITK.V         |
| 1834.07                         | 1833.99                           | 0.08       | 335               | 352 | K.VFSNGADLSGVTEEAPLK.L |

**Table S15.** Tryptic peptides from Spot #166 measured by MALDI-TOF. The protein was identified as complement C4-B, NCBI accession gi:187771. Measured masses from the MALDI-TOF spectrum are compared to calculated values. Masses listed represent 9% sequence coverage. MS-Fit MOWSE score: 8.53e+06; Mascot score: 49, expect value: 0.27.

| Measured mass,<br>amu (average) | Calculated mass,<br>amu (average) | error, amu | Sequence Position |      | Sequence                        |
|---------------------------------|-----------------------------------|------------|-------------------|------|---------------------------------|
|                                 |                                   |            | Start             | End  |                                 |
| 1334.43                         | 1334.54                           | -0.11      | 513               | 523  | R.GQIVFMNREPK.R + Oxidation (M) |
| 2551.81                         | 2551.74                           | 0.07       | 957               | 979  | R.TLEIPGNSDPNMIPDGFNSYVR.V      |
| 2483.63                         | 2483.73                           | -0.09      | 980               | 1005 | R.VTASDPLDTLGSEGALSPGGVASLLR.L  |
| 1953.26                         | 1953.24                           | 0.02       | 1009              | 1026 | R.GCGEQTMIYLAPTLAASR.Y          |
| 1936.04                         | 1936.12                           | -0.08      | 1027              | 1042 | R.YLDKTEQWSTLPPETK.D            |
| 1324.21                         | 1324.44                           | -0.23      | 1061              | 1072 | R.KADGSYAAWLSR.G                |
| 1195.99                         | 1196.27                           | -0.28      | 1062              | 1072 | K.ADGSYAAWLSR.G                 |
| 1541.63                         | 1541.70                           | -0.07      | 1085              | 1099 | K.VLSLAQEQVGGSPK.L              |
| 1433.87                         | 1433.59                           | 0.28       | 1279              | 1291 | K.AEMADQAAWLTR.Q                |
| 983.08                          | 983.04                            | 0.04       | 1292              | 1300 | R.QGSFQGGFR.S                   |
| 2778.94                         | 2778.98                           | -0.03      | 1301              | 1325 | R.STQDTVIALDALSAWIASHTTEER.G    |



**Table S16.** Tryptic peptides from Spot #193 measured by MALDI-TOF. The protein was identified as carboxypeptidase N catalytic chain, SwissProt accession P15169. Measured masses from the MALDI-TOF spectrum are compared to calculated values. Masses listed represent 37% sequence coverage. MS-Fit MOWSE score: 3.47e+07; Mascot score: 121, expect value: 1.6e-08.

| Measured mass,<br>amu (average) | Calculated mass,<br>amu (average) | error, amu | Sequence Position |     | Sequence                                               |
|---------------------------------|-----------------------------------|------------|-------------------|-----|--------------------------------------------------------|
|                                 |                                   |            | Start             | End |                                                        |
| 1187.32                         | 1187.33                           | 0.00       | 38                | 47  | K.VQNECPGITR.V                                         |
| 2586.04                         | 2585.86                           | 0.18       | 59                | 80  | R.HLYVLEFSDHPGIHEPLEPEVK.Y                             |
| 1417.59                         | 1417.55                           | 0.04       | 81                | 93  | K.YVGNMHGNEALGR.E                                      |
| 1433.58                         | 1433.55                           | 0.03       | 81                | 93  | K.YVGNMHGNEALGR.E + Oxidation (M)                      |
| 1958.23                         | 1958.26                           | -0.03      | 94                | 108 | R.ELMLQLSEFLCEEFR.N                                    |
| 1974.37                         | 1974.26                           | 0.11       | 94                | 108 | R.ELMLQLSEFLCEEFR.N + Oxidation (M)                    |
| 1085.37                         | 1085.25                           | 0.12       | 114               | 122 | R.IVQLIQDTR.I                                          |
| 3065.58                         | 3065.46                           | 0.12       | 123               | 151 | R.IHILPSMNPDGYEVAQAQGNKPGYLVGR.N                       |
| 3081.78                         | 3081.46                           | 0.32       | 123               | 151 | R.IHILPSMNPDGYEVAQAQGNKPGYLVGR.N + Oxidation (M)       |
| 1745.03                         | 1744.91                           | 0.13       | 176               | 190 | K.YGGPNHHLPLPDNWK.S                                    |
| 1752.93                         | 1753.01                           | -0.07      | 329               | 343 | R.EALIQFLEQVHQGIK.G                                    |
| 3795.46                         | 3795.02                           | 0.44       | 344               | 378 | K.GMVLDENYNLANAVISVSGINHDTVSGDHGDYFR.L                 |
| 3811.01                         | 3811.02                           | -0.01      | 344               | 378 | K.GMVLDENYNLANAVISVSGINHDTVSGDHGDYFR.L + Oxidation (M) |
| 982.25                          | 982.14                            | 0.12       | 418               | 426 | R.SIPQVSPVR.R                                          |

**Table S17.** Tryptic peptides from Spot #370 measured by MALDI-TOF. The protein was identified as complement C3C, N-terminal fragment, NCBI accession gi:78101270. Measured masses from the MALDI-TOF spectrum are compared to calculated values. Masses listed represent 4.8% sequence coverage. MS-Fit MOWSE score: 8.6e+03.

| Measured mass,<br>amu (average) | Calculated mass,<br>amu (average) | error, amu | Sequence Position |     | Sequence                                  |
|---------------------------------|-----------------------------------|------------|-------------------|-----|-------------------------------------------|
|                                 |                                   |            | Start             | End |                                           |
| 1816.76                         | 1816.92                           | -0.15      | 1                 | 16  | -.SNLDEDIIAEENIVSR.S                      |
| 2487.11                         | 2486.86                           | 0.25       | 66                | 86  | K.GICVADPFEVTVMQDFFIDLR.L                 |
| 2502.94                         | 2502.86                           | 0.08       | 66                | 86  | K.GICVADPFEVTVMQDFFIDLR.L + Oxidation (M) |
| 2070.39                         | 2070.41                           | -0.02      | 114               | 131 | K.VRVELLHNPAFCSLATTK.R                    |
| 1304.61                         | 1304.50                           | 0.11       | 133               | 143 | R.RHQQTVTIPPK.S                           |
| 1471.70                         | 1471.62                           | 0.08       | 166               | 178 | K.AAVYHHFISDGVR.K                         |

**Table S18.** Tryptic peptides from Spot #458 measured by MALDI-TOF. The protein was identified as apolipoprotein A-I, SwissProt accession P02647. Measured masses from the MALDI-TOF spectrum are compared to calculated values. Masses listed represent 23% sequence coverage. MS-Fit MOWSE score: 9.8e+03; Mascot score: 50, expect value: 0.2.

| Measured mass,<br>amu (average) | Calculated mass,<br>amu (average) | error, amu | Sequence Position |     | Sequence             |
|---------------------------------|-----------------------------------|------------|-------------------|-----|----------------------|
|                                 |                                   |            | Start             | End |                      |
| 1235.21                         | 1235.43                           | -0.21      | 37                | 47  | K.DLATVYVDVLK.D      |
| 1400.22                         | 1400.49                           | -0.27      | 52                | 64  | R.DYVSQFEGSALGK.Q    |
| 1612.65                         | 1612.73                           | -0.08      | 70                | 83  | K.LLDNWDSVTSTFSK.L   |
| 1933.15                         | 1933.08                           | 0.07       | 86                | 101 | R.EQLGPVTQEFWDNLEK.E |
| 1252.33                         | 1252.37                           | -0.04      | 121               | 130 | K.VQPYLDDFQK.K       |

**Table S19.** Tryptic peptides from Spot #490 measured by MALDI-TOF. The protein was identified as apolipoprotein A-I, SwissProt accession P02647. Measured masses from the MALDI-TOF spectrum are compared to calculated values. Masses listed represent 23% sequence coverage. MS-Fit MOWSE score: 9.8e+03; Mascot score: 54, expect value: 0.09.

| Measured mass,<br>amu (average) | Calculated mass,<br>amu (average) | error, amu | Sequence Position |     | Sequence             |
|---------------------------------|-----------------------------------|------------|-------------------|-----|----------------------|
|                                 |                                   |            | Start             | End |                      |
| 1235.14                         | 1235.43                           | -0.28      | 37                | 47  | K.DLATVYVDVLK.D      |
| 1400.36                         | 1400.49                           | -0.13      | 52                | 64  | R.DYVSQFEGSALGK.Q    |
| 1612.67                         | 1612.73                           | -0.06      | 70                | 83  | K.LLDNWDSVTSTFSK.L   |
| 1933.01                         | 1933.08                           | -0.07      | 86                | 101 | R.EQLGPVTQEFWDNLEK.E |
| 1252.13                         | 1252.37                           | -0.24      | 121               | 130 | K.VQPYLDDFQK.K       |
